# Supplementary material for: Application of Machine Learning to Metabolomic Profile Characterization in Glioblastoma Patients Undergoing Concurrent Chemoradiation
Source: MDPI journal article supplement (doi:10.3390/metabo13020299), 2023-02-17
Supplement: s1 [file s1]

**Supplementary Table S1:** Table details metabolites with significant changes. Req rounded to the second decimal place. Sub class information obtained using Metabolomics Workbench (<https://www.metabolomicsworkbench.org/databases/refmet/index.php>). “NA” lower match score or library match.

| BinBase name             | PubChem  | KEGG   | Superclass                              | rq_new_est   | P Value     |
|--------------------------|----------|--------|-----------------------------------------|--------------|-------------|
| sorbitol                 | 5780     | C00794 | Organic oxygen compounds                | -1.744103192 | 3.03E-18    |
| glucuronic acid          | 94715    | C00191 | Organic oxygen compounds                | -1.661830824 | 4.37E-20    |
| mannose-6-phosphate      | 65127    | C00275 | Organic oxygen compounds                | -1.659637299 | 9.02E-13    |
| mannitol                 | 6251     | C00392 | Organic oxygen compounds                | -1.517557588 | 5.54E-19    |
| linoleic acid            | 5280450  | C01595 | Lipids and lipid-like molecules         | -1.37343669  | 1.64E-08    |
| linolenic acid           | 5280934  | C06427 | Lipids and lipid-like molecules         | -1.331943426 | 7.14E-09    |
| 6-deoxyglucitol          | 151266   |        | Organic oxygen compounds                | -1.206081692 | 1.32E-08    |
| 3-hydroxybutyric acid    | 92135    | C01089 | Organic acids and derivatives           | -0.924644368 | 0.000100824 |
| gluconic acid            | 6857417  | C00800 | Organic acids and derivatives           | -0.704779634 | 0.016795591 |
| tocopherol gamma-        | 92729    | C02483 | Lipids and lipid-like molecules         | -0.70258476  | 0.000120132 |
| oleic acid               | 445639   | C00712 | Lipids and lipid-like molecules         | -0.603480924 | 0.00038113  |
| glycerol                 | 753      | C00116 | Organic oxygen compounds                | -0.533083884 | 0.015413684 |
| 2-hydroxybutanoic acid   | 440864   | C05984 | Organic acids and derivatives           | 0.270067871  | 0.013981071 |
| N-acetylglycine          | 10972    | C02055 | Organic acids and derivatives           | 0.29920216   | 0.040657137 |
| hydroxyproline dipeptide | 61159526 |        | Organic acids and derivatives           | 0.382516798  | 0.041324664 |
| oleamide                 | 5283387  | C19670 | Lipids and lipid-like molecules         | 0.40541256   | 1.53E-06    |
| tocopherol alpha-        | 14985    | C02477 | Lipids and lipid-like molecules         | 0.409796305  | 0.01515781  |
| uric acid                | 1175     | C00366 | Organoheterocyclic compounds            | 0.410680566  | 0.001413049 |
| arachidic acid           | 10467    | C06425 | Lipids and lipid-like molecules         | 0.474019778  | 0.004042598 |
| threonic acid            | 5460407  | C01620 | Organic oxygen compounds                | 0.492712598  | 4.33E-05    |
| 3-aminoisobutyric acid   | 64956    | C05145 | Organic acids and derivatives           | 0.525882779  | 0.014904055 |
| indole-3-propionic acid  | 3744     |        | Organoheterocyclic compounds            | 0.549573137  | 0.000163273 |
| squalene                 | 638072   | C00751 | Lipids and lipid-like molecules         | 0.565632998  | 2.41E-06    |
| 2-deoxytetronic acid     | 150929   |        | Organic acids and derivatives           | 0.56792359   | 1.25E-05    |
| inosine                  | 6021     | C00294 | Nucleosides, nucleotides, and analogues | 0.572993734  | 0.016102833 |
| aconitic acid            | 643757   | C00417 | Organic acids and derivatives           | 0.58031309   | 0.001087993 |
| 5-methoxytryptamine      | 1833     | C05659 | Organoheterocyclic compounds            | 0.588423889  | 0.000315391 |
| pseudo uridine           | 15047    | C02067 | Nucleosides, nucleotides, and analogues | 0.592419727  | 0.000116934 |
| glutamic acid            | 33032    | C00025 | Organic acids and derivatives           | 0.607066458  | 0.000421518 |
| palmitic acid            | 985      | C00249 | Lipids and lipid-like molecules         | 0.610786018  | 0.000361021 |
| pipecolinic acid         | 6931662  | C00408 | Organic acids and derivatives           | 0.616464079  | 6.43E-05    |

|                             |         |        |                                         |             |             |
|-----------------------------|---------|--------|-----------------------------------------|-------------|-------------|
| phosphoethanolamine         | 1015    | C00346 | Organic acids and derivatives           | 0.64565875  | 0.000195703 |
| erythritol                  | 222285  | C00503 | Organic oxygen compounds                | 0.6510168   | 9.32E-05    |
| xylitol                     | 6912    | C00379 | Organic oxygen compounds                | 0.655524549 | 0.000464126 |
| glycerol-alpha-phosphate    | 754     | C03189 | Lipids and lipid-like molecules         | 0.657325322 | 1.02E-05    |
| adenosine                   | 60961   | C00212 | Nucleosides, nucleotides, and analogues | 0.66071442  | 0.000271334 |
| 2,3-dihydroxybutanoic acid  | 250402  |        | Organic oxygen compounds                | 0.673687123 | 5.81E-05    |
| arachidonic acid            | 444899  | C00219 | Lipids and lipid-like molecules         | 0.681398423 | 0.000190558 |
| inositol-4-monophosphate    | 440043  | C03546 | Organic oxygen compounds                | 0.68448704  | 0.003944813 |
| 3-Aminopiperidine-2,6-dione | 134508  |        | Organic acids and derivatives           | 0.696733034 | 0.00128681  |
| xanthine                    | 1188    | C00385 | Organoheterocyclic compounds            | 0.700183044 | 1.89E-06    |
| levoglucosan                | 2724705 | C22350 | Organoheterocyclic compounds            | 0.702005579 | 6.80E-07    |
| myristic acid               | 11005   | C06424 | Lipids and lipid-like molecules         | 0.710294654 | 2.67E-05    |
| glyceric acid               | 752     | C00258 | Organic oxygen compounds                | 0.712553047 | 0.000362198 |
| 2-ethylcaproic acid         | 8697    |        | Lipids and lipid-like molecules         | 0.72635205  | 9.19E-05    |
| isocitric acid              | 5318532 | C00451 | Organic acids and derivatives           | 0.726616127 | 2.20E-06    |
| citric acid                 | 311     | C00158 | Organic acids and derivatives           | 0.748033739 | 0.000392481 |
| aspartic acid               | 5960    | C00049 | Organic acids and derivatives           | 0.755238702 | 2.08E-06    |
| myo-inositol                | 892     | C00137 | Organic oxygen compounds                | 0.769032442 | 0.000371229 |
| 6-deoxyglucose              | 441480  | C08352 | Organic oxygen compounds                | 0.782550078 | 1.51E-07    |
| guanosine                   | 6802    | C00387 | Nucleosides, nucleotides, and analogues | 0.787471242 | 0.00063282  |
| triethanolamine             | 7618    | C06771 | Organic nitrogen compounds              | 0.787834845 | 0.000381666 |
| heptanoic acid              | 8094    | C17714 | Lipids and lipid-like molecules         | 0.798841483 | 0.00022587  |
| 2-hydroxyglutaric acid      | 43      | C02630 | Organic acids and derivatives           | 0.801325561 | 3.54E-05    |
| proline                     | 145742  | C00148 | Organic acids and derivatives           | 0.802153852 | 0.000504163 |
| deoxypentitol               | 270738  |        | Organic oxygen compounds                | 0.814554933 | 3.45E-08    |
| 9-myristoleate              | 5461014 |        | Lipids and lipid-like molecules         | 0.815553083 | 0.000335399 |
| indoxyl sulfate             | 10258   |        | Organic acids and derivatives           | 0.833307239 | 7.15E-08    |
| capric acid                 | 2969    | C01571 | Lipids and lipid-like molecules         | 0.833860879 | 1.58E-06    |
| caproic acid                | 8892    | C01585 | Lipids and lipid-like molecules         | 0.834181737 | 0.000226587 |
| ribitol                     | 827     | C00474 | Organic oxygen compounds                | 0.83902516  | 1.53E-05    |
| ribose                      | 5779    | C00121 | Organic oxygen compounds                | 0.855628861 | 4.23E-05    |
| methanolphosphate           | 13130   |        | Organic acids and derivatives           | 0.874438614 | 4.00E-07    |
| propyleneglycol             | 259994  | C02912 | Organic oxygen compounds                | 0.893100673 | 3.01E-05    |
| mandelic acid               | 1292    |        | Benzenoids                              | 0.89458187  | 8.62E-05    |
| fumaric acid                | 444972  | C00122 | Organic acids and derivatives           | 0.899176407 | 7.42E-08    |
| hypoxanthine                | 790     | C00262 | Organoheterocyclic compounds            | 0.90364736  | 9.29E-07    |

|                           |          |        |                                 |             |          |
|---------------------------|----------|--------|---------------------------------|-------------|----------|
| phenylethylamine          | 1001     | C05332 | Benzenoids                      | 0.904517777 | 4.38E-05 |
| kynurenine                | 25245862 | C01718 | Organic oxygen compounds        | 0.907527954 | 2.88E-07 |
| ketoisoleucine            | 47       | C03465 | Organic acids and derivatives   | 0.934114142 | 8.62E-07 |
| adipic acid               | 196      | C06104 | Lipids and lipid-like molecules | 0.939214724 | 9.88E-05 |
| trans-4-hydroxyproline    | 5810     | C01157 | Organic acids and derivatives   | 0.955823562 | 7.78E-08 |
| glycerol-3-galactoside    | 16048618 | C05401 | Lipids and lipid-like molecules | 0.967414672 | 2.99E-08 |
| fucose                    | 439650   | C02095 | Organic oxygen compounds        | 0.970338203 | 1.20E-09 |
| indole-3-acetate          | 802      | C00954 | Organoheterocyclic compounds    | 0.972320483 | 2.99E-08 |
| tartaric acid             | 444305   | C00898 | Organic oxygen compounds        | 0.974513969 | 8.02E-06 |
| glutamine                 | 5961     | C00064 | Organic acids and derivatives   | 0.975585203 | 3.48E-05 |
| hypotaurine               | 107812   | C00519 | Organic acids and derivatives   | 0.983711393 | 5.38E-08 |
| threitol                  | 169019   | C16884 | Organic oxygen compounds        | 0.992428344 | 9.34E-09 |
| lignoceric acid           | 11197    | C08320 | Lipids and lipid-like molecules | 0.995733064 | 5.43E-06 |
| lactulose                 | 11333    | C07064 | Organic oxygen compounds        | 1.023933365 | 6.15E-08 |
| lactic acid               | 612      | C01432 | Organic acids and derivatives   | 1.024777763 | 2.80E-06 |
| maltose                   | 439186   | C00208 | Organic oxygen compounds        | 1.033187368 | 3.70E-06 |
| tryptamine                | 1150     | C00398 | Organoheterocyclic compounds    | 1.037870216 | 5.82E-05 |
| urea                      | 1176     | C00086 | Organic acids and derivatives   | 1.046969757 | 1.70E-06 |
| benzoic acid              | 243      | C00180 | Benzenoids                      | 1.051970849 | 4.87E-08 |
| malic acid                | 525      | C00711 | Organic acids and derivatives   | 1.06377356  | 7.78E-11 |
| histidine                 | 6274     | C00135 | Organic acids and derivatives   | 1.067398638 | 4.08E-05 |
| succinate semialdehyde    | 9543238  |        | Lipids and lipid-like molecules | 1.073998938 | 3.37E-06 |
| acetoacetate              | 6971017  | C00164 | Organic acids and derivatives   | 1.080215576 | 8.54E-07 |
| ethanolamine              | 700      | C00189 | Organic nitrogen compounds      | 1.081110309 | 2.33E-08 |
| citrulline                | 9750     | C00327 | Organic acids and derivatives   | 1.084149361 | 1.56E-09 |
| 2-hydroxyvaleric acid     | 98009    |        | Lipids and lipid-like molecules | 1.084471601 | 9.29E-09 |
| 2-aminobutyric acid       | 6657     | C02721 | Organic acids and derivatives   | 1.085690211 | 4.07E-06 |
| beta-alanine              | 239      | C00099 | Organic acids and derivatives   | 1.091216389 | 2.84E-10 |
| 1-monopalmitin            | 14900    |        | Lipids and lipid-like molecules | 1.099380772 | 4.63E-07 |
| salicylic acid            | 338      | C00805 | Benzenoids                      | 1.102073456 | 2.76E-06 |
| acetaminophen             | 1983     | C06804 | Benzenoids                      | 1.107858101 | 4.57E-06 |
| acetaminophen glucuronide | 83944    |        | Organic oxygen compounds        | 1.117050477 | 1.22E-06 |
| phenol                    | 996      | C00146 | Benzenoids                      | 1.118833689 | 2.47E-07 |
| lauric acid               | 3893     | C02679 | Lipids and lipid-like molecules | 1.123835216 | 4.08E-07 |
| isothreonic acid          | 151152   | C00639 | Organic oxygen compounds        | 1.146566802 | 2.82E-10 |
| azelaic acid              | 19347555 | C08261 | Lipids and lipid-like molecules | 1.147879337 | 3.00E-07 |
| cystine                   | 595      | C01420 | Organic acids and derivatives   | 1.156164328 | 7.99E-08 |
| sucrose                   | 5988     | C00089 | Organic oxygen compounds        | 1.159878886 | 8.65E-08 |
| creatinine                | 588      | C00791 | Organic acids and derivatives   | 1.162729574 | 3.61E-07 |
| serine                    | 5951     | C00065 | Organic acids and derivatives   | 1.165318348 | 5.71E-08 |

|                          |          |        |                                 |             |          |
|--------------------------|----------|--------|---------------------------------|-------------|----------|
| isoleucine               | 6306     | C00407 | Organic acids and derivatives   | 1.18415286  | 2.40E-08 |
| 2-ketobutyric acid       | 58       | C00109 | Organic acids and derivatives   | 1.187938655 | 6.68E-08 |
| glutaric acid            | 743      | C00489 | Organic acids and derivatives   | 1.189177627 | 2.92E-07 |
| 2-hydroxyisovaleric acid | 99823    |        | Lipids and lipid-like molecules | 1.197934136 | 4.12E-10 |
| alpha-ketoglutarate      | 51       | C00026 | Organic acids and derivatives   | 1.200339742 | 1.14E-08 |
| hippuric acid            | 464      | C01586 | Benzenoids                      | 1.204498885 | 4.80E-08 |
| lyxose                   | 439240   | C00476 | Organic oxygen compounds        | 1.217059858 | 4.57E-08 |
| glycine                  | 750      | C00037 | Organic acids and derivatives   | 1.218257591 | 7.05E-11 |
| conduritol-beta-epoxide  | 9989541  |        | Organoheterocyclic compounds    | 1.219341955 | 3.10E-09 |
| 2-ketoisocaproic acid    | 70       | C00233 | Organic acids and derivatives   | 1.221724534 | 5.70E-10 |
| oxoproline               | 7405     | C01879 | Organic acids and derivatives   | 1.23083697  | 2.02E-13 |
| lactose                  | 6134     | C01970 | Organic oxygen compounds        | 1.251549431 | 5.30E-12 |
| succinic acid            | 1110     | C00042 | Organic acids and derivatives   | 1.255304045 | 1.13E-09 |
| 3-hydroxypropionic acid  | 68152    | C01013 | Organic acids and derivatives   | 1.271232761 | 7.73E-12 |
| ribonic acid             | 5460677  | C01685 | Organic oxygen compounds        | 1.288524026 | 4.92E-10 |
| fructose                 | 439709   | C02336 | Organic oxygen compounds        | 1.294867984 | 9.46E-14 |
| phosphate                | 1004     | C00009 | Homogeneous non-metal compounds | 1.304785806 | 7.27E-10 |
| cholesterol              | 5997     | C00187 | Lipids and lipid-like molecules | 1.314927656 | 1.18E-11 |
| putrescine               | 1045     | C00138 | Organic nitrogen compounds      | 1.321182842 | 5.30E-10 |
| leucine                  | 6106     | C00123 | Organic acids and derivatives   | 1.326070926 | 8.32E-11 |
| lactamide                | 94220    |        | Organic oxygen compounds        | 1.334167768 | 8.89E-11 |
| phthalic acid            | 1017     | C01606 | Benzenoids                      | 1.361315979 | 1.38E-08 |
| terephthalic acid        | 22416364 | C06337 | Benzenoids                      | 1.390455495 | 2.07E-10 |
| glucose                  | 64689    | C00221 | Organic oxygen compounds        | 1.390578057 | 3.08E-14 |
| phenylacetic acid        | 999      | C07086 | Benzenoids                      | 1.421159264 | 2.49E-11 |
| xylose                   | 135191   | C00181 | Organic oxygen compounds        | 1.428130139 | 7.58E-14 |
| indole-3-lactate         | 92904    | C02043 | Organoheterocyclic compounds    | 1.433659257 | 6.61E-12 |
| glycolic acid            | 757      | C00160 | Organic acids and derivatives   | 1.477396417 | 3.77E-12 |
| alanine                  | 5950     | C00041 | Organic acids and derivatives   | 1.489719822 | 2.86E-10 |
| mannose                  | 18950    | C00159 | Organic oxygen compounds        | 1.493799144 | 1.14E-11 |
| valine                   | 6287     | C00183 | Organic acids and derivatives   | 1.497286265 | 3.55E-12 |
| ornithine                | 6262     | C00077 | Organic acids and derivatives   | 1.499587807 | 1.75E-13 |
| methionine               | 6137     | C00073 | Organic acids and derivatives   | 1.507823367 | 2.29E-11 |
| asparagine               | 6267     | C00152 | Organic acids and derivatives   | 1.542920719 | 4.48E-10 |
| threonine                | 6288     | C00188 | Organic acids and derivatives   | 1.611893927 | 2.79E-12 |
| lysine                   | 5962     | C00047 | Organic acids and derivatives   | 1.631233023 | 1.51E-13 |
| tyrosine                 | 6057     | C00082 | Organic acids and derivatives   | 1.633429276 | 9.11E-17 |
| phenylalanine            | 6140     | C00079 | Organic acids and derivatives   | 1.786072299 | 2.74E-17 |
| tryptophan               | 6305     | C00078 | Organoheterocyclic compounds    | 1.830114175 | 2.78E-18 |

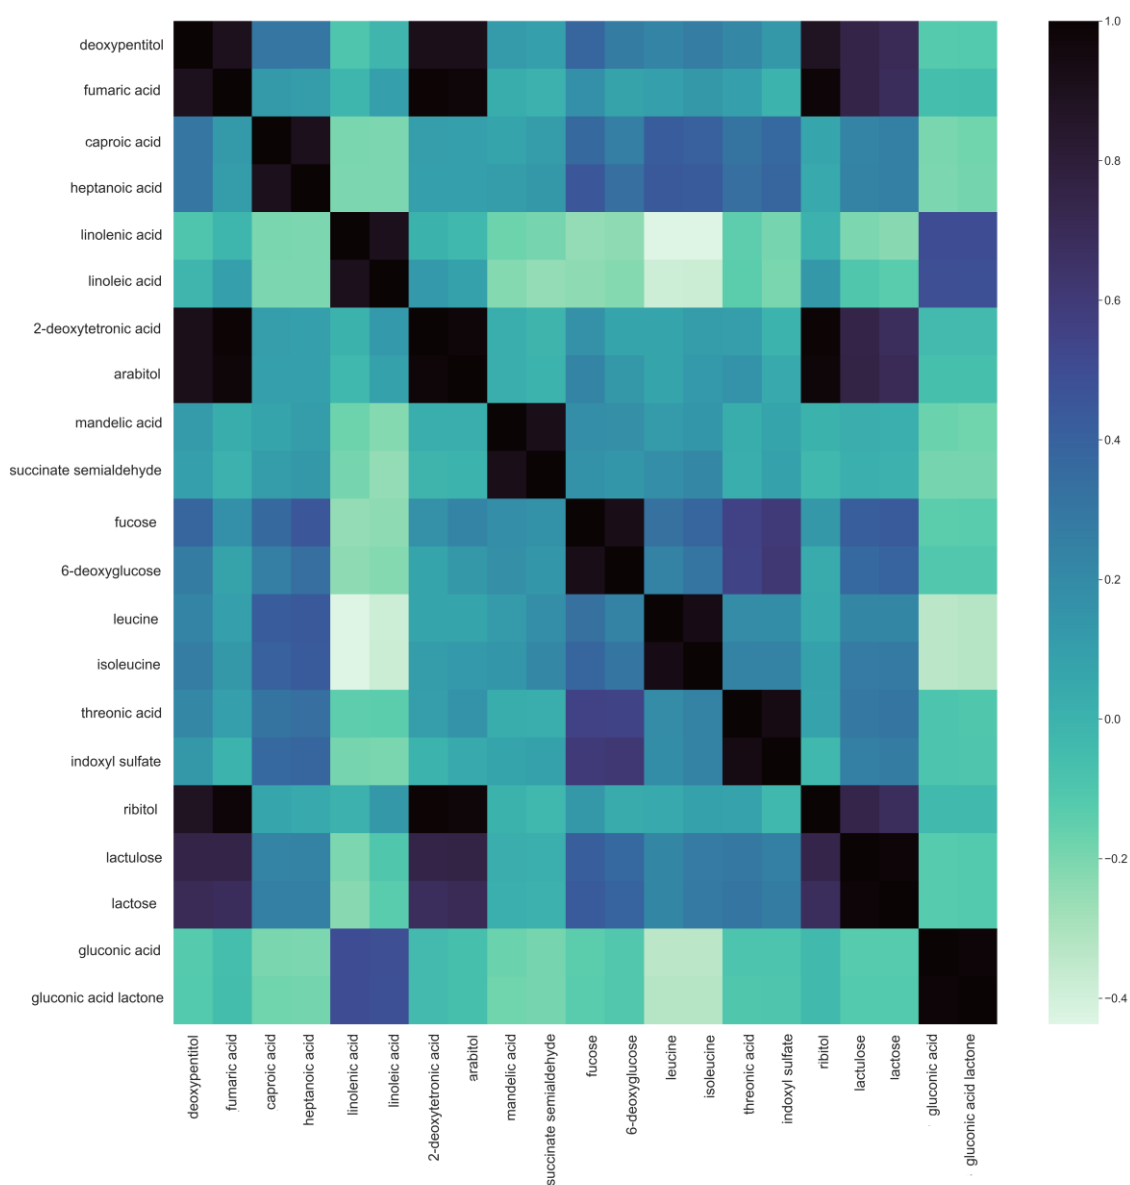

**Supplementary Figure S1:** Heatmap of Pearson's correlation coefficients a between plasma concentrations of metabolites with cut-off  $r > 0.90$ . Significance for pairwise comparison detailed in the results section. The correlation score can be visualized through the scale bar on the right.

A

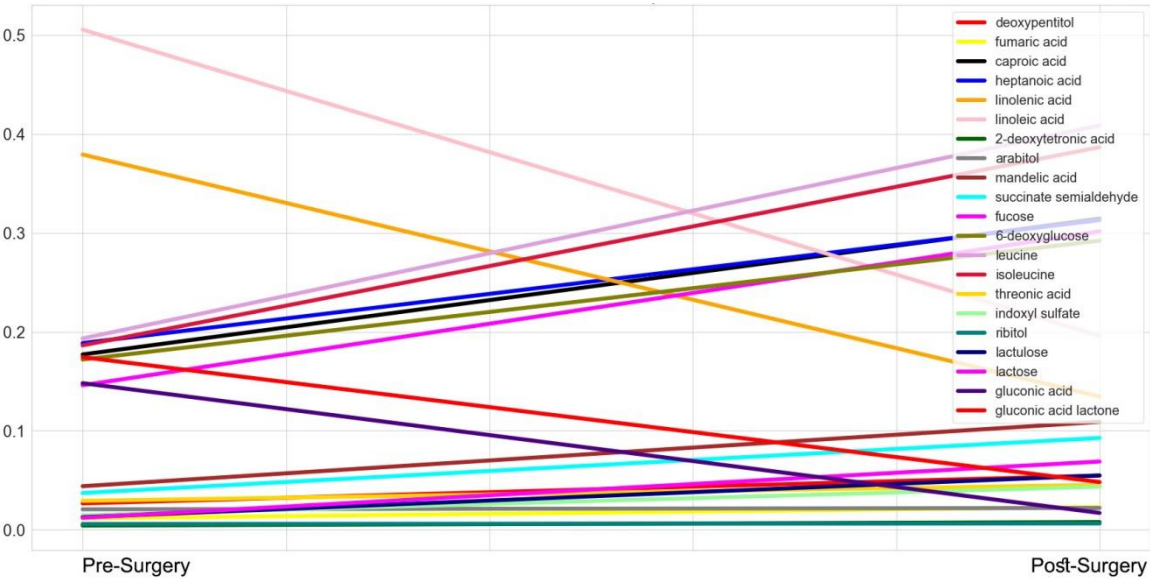

B

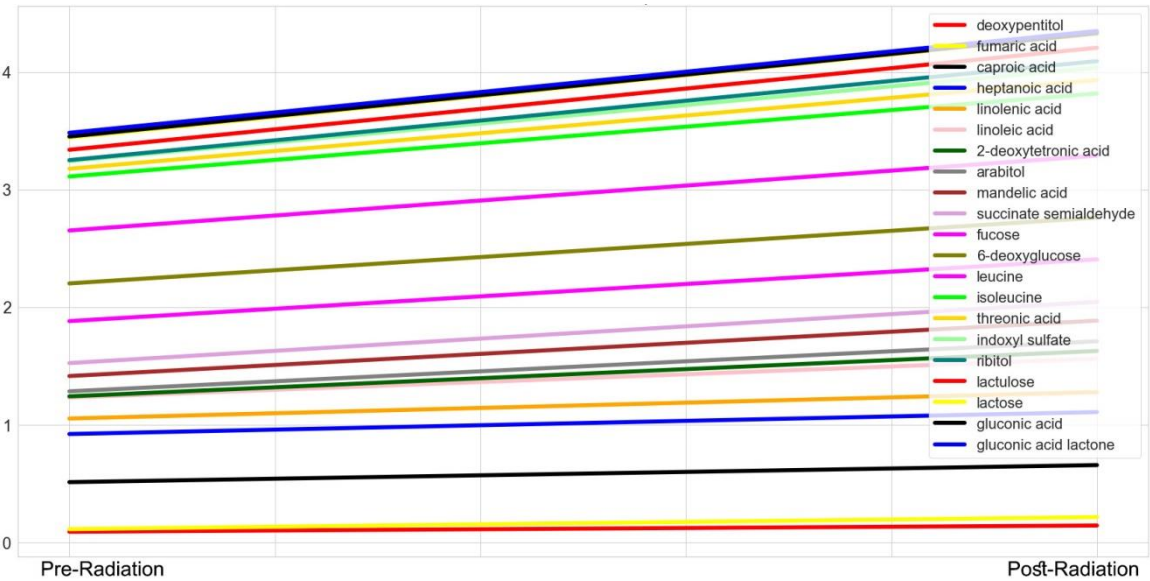

C

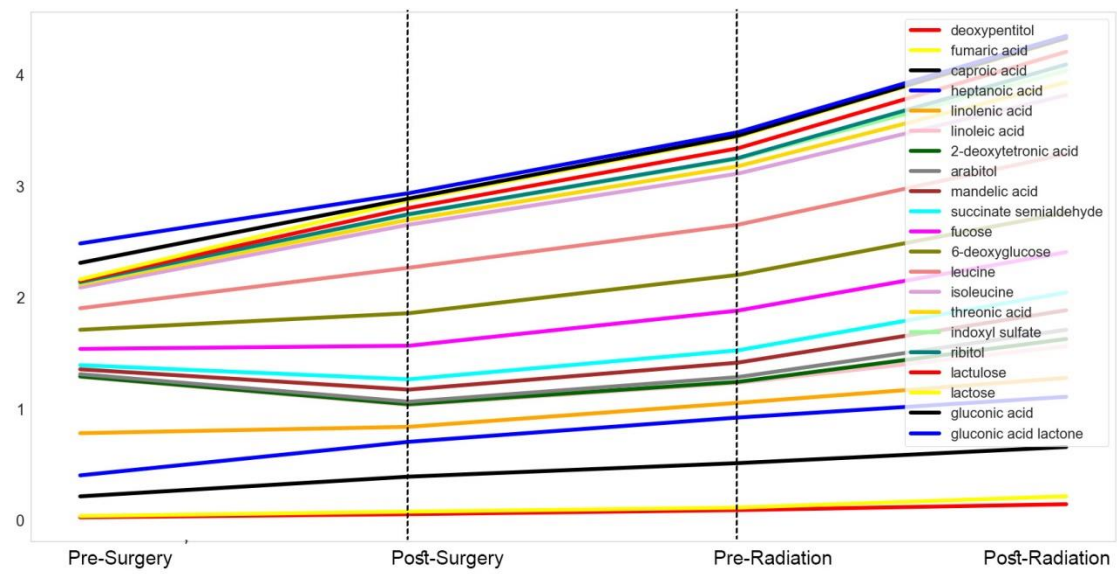

**Supplementary Figure S2:** Comparative profiling of highly correlated metabolites per treatment stage. The lines represent mean of the scaled data for each metabolite. **A:** Comparison of levels of highly correlated metabolites in pre-surgery vs post-surgery. **B:** Comparison of levels of highly correlated metabolites in pre-radiation vs post-radiation. **C:** Comparison of levels of highly correlated metabolites in the four stages of treatment.
